# Supplementary material for: A guide for studying among-individual behavioral variation from movement data in the wild
Source: Springer Nature journal article supplement (doi:10.1186/s40462-020-00216-8), 2020-06-29
Supplement: MOESM2 [file 40462_2020_216_MOESM2_ESM.rds]

Archive with 1 entries (1 files):
- 40462_2020_216_MOESM2_ESM.rds.out
